# Supplementary material for: Effects of Stocking Density on the Growth Performance, Physiological Parameters, Redox Status and Lipid Metabolism of Micropterus salmoides in Integrated Rice–Fish Farming Systems
Source: MDPI journal article supplement (doi:10.3390/antiox11071215), 2022-06-21
Supplement: s1 [file s1]

# Supporting Information

**Table S1.** Specific primer sequences for qPCR in the study

| Gene                                                            | Primer sequence(5'-3')                               |
|-----------------------------------------------------------------|------------------------------------------------------|
| <i>peroxisome proliferator-activated receptor alpha (ppara)</i> | F: TGCCAGAGTACCTCAGTGGA<br>R: GGCCGTCTTTGTTTCATGCAG  |
| <i>lipoprotein lipase (lpl)</i>                                 | F: CCTGCTAGTGACGGAGACG<br>R: CCATCTTTTGTGGGTCTCGC    |
| <i>long-chain acyl-CoA synthetase (acsl)</i>                    | F: ACTGGTGGATGTGCCAGAAA<br>R: TCAGAGTGCCGTTAGGAAGC   |
| <i>stearoyl-CoA desaturase 1 (scd1)</i>                         | F: TGCTGAGGTACACGTTGGTG<br>R: TCTTGTCGTAGGGCCTGTTTC  |
| <i>fatty acid-binding protein 3 (fabp3)</i>                     | F: AGAGCACCTTCAAACTACCGA<br>R: TTCTTTGCCGTCCAGCTTT   |
| <i>sterol 14alpha-demethylase (cyp51)</i>                       | F: TGCCACCTACAAAGACGGAC<br>R: CAGGTCTTCTCCACAGACGG   |
| <i>acetyl-CoA C-acetyltransferase (acat2)</i>                   | F: AGCAGCAGCAACTGTCCTAAT<br>R: CCTGCTTTCTCAACCGCTTTC |
| <i>hydroxymethylglutaryl-CoA synthase (hmgcs1)</i>              | F: TACGGATCAGGATTTGCTGC<br>R: ATTGGCTAGGTGATGCGTCT   |
| <i>β-actin</i>                                                  | F: AAAGGGAAATCGTGCGTGAC<br>R: AAGGAAGGCTGGAAGAGGG    |

**Table S2** Valid data used in transcriptome analysis

| Samples | Raw reads  | Clean Reads (%) | Q20 (%) | Q30 (%) | GC (%) | Mapping ratio (%) | Sequenced gene |
|---------|------------|-----------------|---------|---------|--------|-------------------|----------------|
| LL-1    | 50,146,234 | 98.94           | 96.09   | 90.25   | 48.08  | 93.36             | 18,512         |
| LL -2   | 49,525,544 | 99.15           | 96.23   | 90.52   | 48.53  | 93.91             | 19,956         |
| LL -3   | 41,643,142 | 99.57           | 97.88   | 93.98   | 48.33  | 96.83             | 19,718         |
| HL-1    | 48,339,076 | 99.13           | 96.43   | 90.95   | 48.63  | 93.92             | 19,502         |
| HL-2    | 40,753,914 | 99.36           | 96.07   | 90.11   | 49.10  | 93.51             | 19,330         |
| HL-3    | 45,075,010 | 99.34           | 97.91   | 94.07   | 48.88  | 97.14             | 19,815         |

GC, GC content in clean reads, Q20 and Q30 the base quality score (Q score) was no less than 20 and 30, respectively, in clean reads. LL, Low density group; HL, High density group.

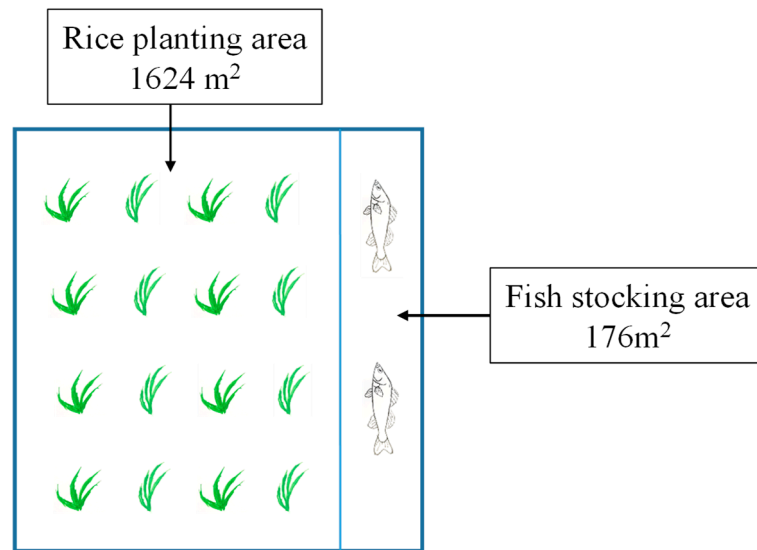

**Figure S1.** Schematic diagram of integrated rice-fish farming system in this study
